# Supplementary material
Source: publisher figshare collection journal article supplement (https://sage.figshare.com/ndownloader/files/23681558)
Supplement: Supplementary file 1 [file 23681558]

**Supplementary Table S4:** Patient pre-and post-operative characteristics for subgroups of cases (0-49, 50-99, 100-149, 150-199, ≥200).

| **Characteristic** | | **0-49** | **50-99** | **100-149** | **150-199** | **≥200** | **Kruskal Wallis test**  p-value | **χ2 Test**  p-value |
| --- | --- | --- | --- | --- | --- | --- | --- | --- |
| **Body Mass Index** (median) (kg/m²) | | 27 | 27 | 27 | 27 | 28 | 11.005 p=0.027 | N/A |
| **Prostate Specific Antigen** (median) (kg/m²) | | 6.5 | 8.2 | 7.8 | 7.3 | 8 | 6.870 p=0.413 | N/A |
| **Clinical T-Stage (cT)**  (n, (%)) | ≤2 | 26 (53.1) | 21 (42.0) | 34 (68.0) | 36 (72.0) | 56 (77.8) | N/A | 22.279 p=0.004 |
| 3a | 21 (42.9) | 27 (54.0) | 16 (32.0) | 14 (28.0) | 16 (22.2) |
| 3b | 2 (4.1) | 2 (4.0) | 0 (0.0) | 0 (0.0) | 1 (1.4) |
| **Pathological Tumour Stage (pT)** (n, (%)) | ≤2 | 28 (57.1) | 24 (48.0) | 25 (50.0) | 29 (58.0) | 42 (57.5) | N/A | 1.915 p=0.751 |
| 3 | 21 (42.8) | 26 (52.0) | 25 (50.0) | 21 (42.0) | 31 (42.5) |
| **pT Stage stratified Positive Surgical Margins**  (n, (%)) | ≤2 | 4  (8.2) | 10 (20.0) | 2  (4.0) | 4  (8.0) | 7 (14.0) | N/A | 3.300 p=0.509 |
| 3 | 6 (12.2) | 9 (18.0) | 4  (8.0) | 1  (2.0) | 3  (6.0) |
